# Supplementary material
Source: PubMed Central journal article supplement (PMC9998853)
Supplement: 41467_2023_36686_MOESM1_ESM.pdf [file 41467_2023_36686_MOESM1_ESM.pdf]

**Figure S1:**

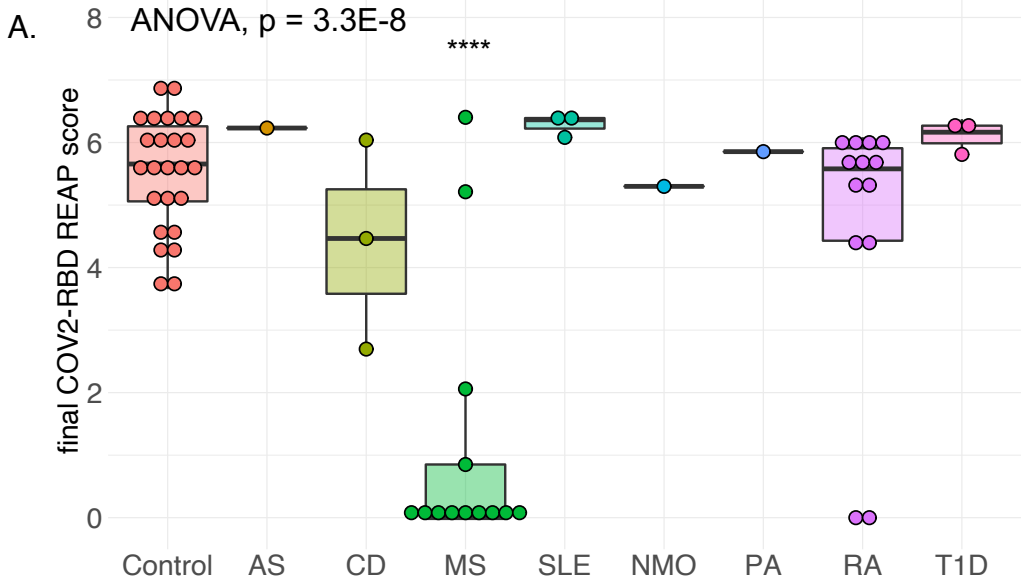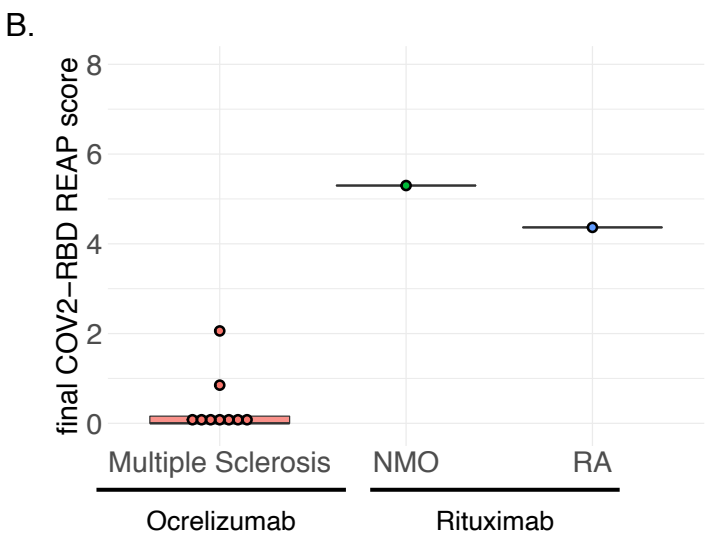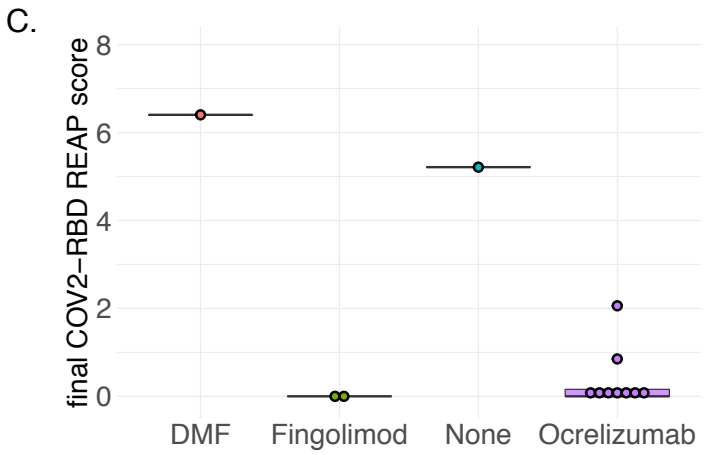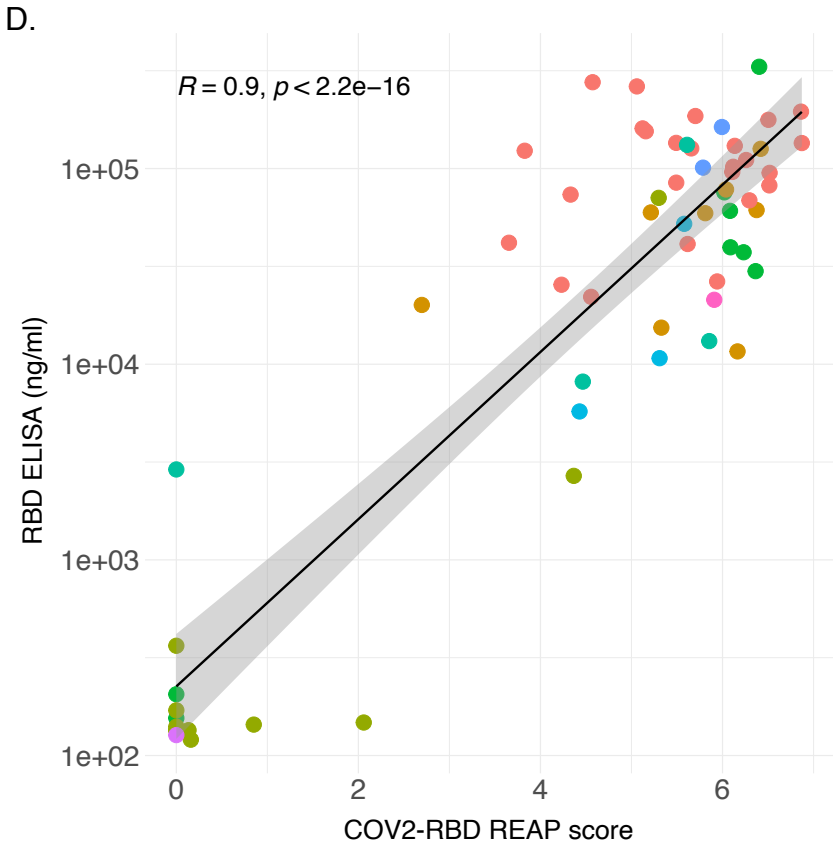

- Healthy Control
- None
- B cell depletion
- DMARD
- Anti-TNF
- Anti-TNF, DMARD
- Anti-IL-6R, DMARD
- CTLA4Ig, DMARD
- JAKi

**Figure S2:**

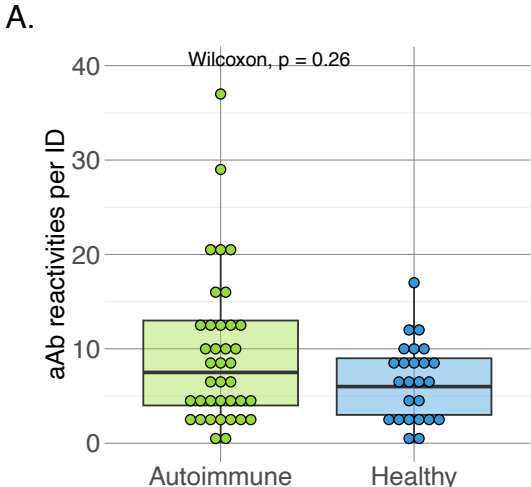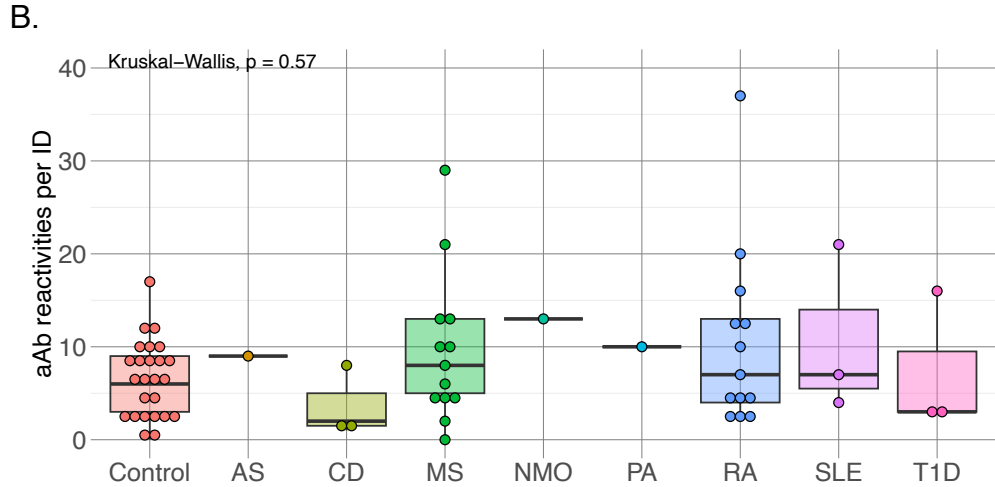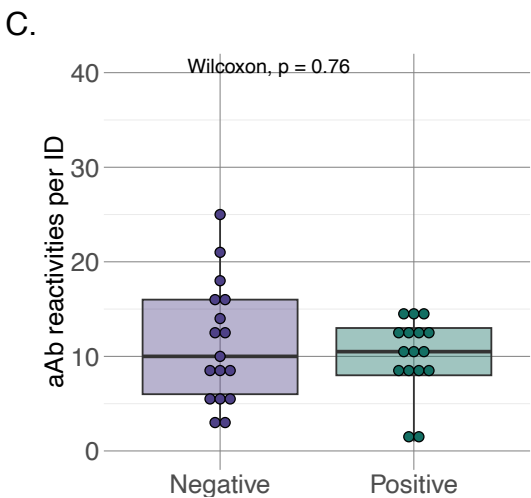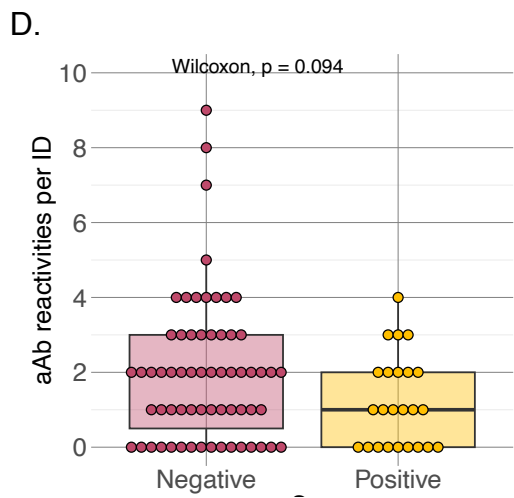

Figure S3:

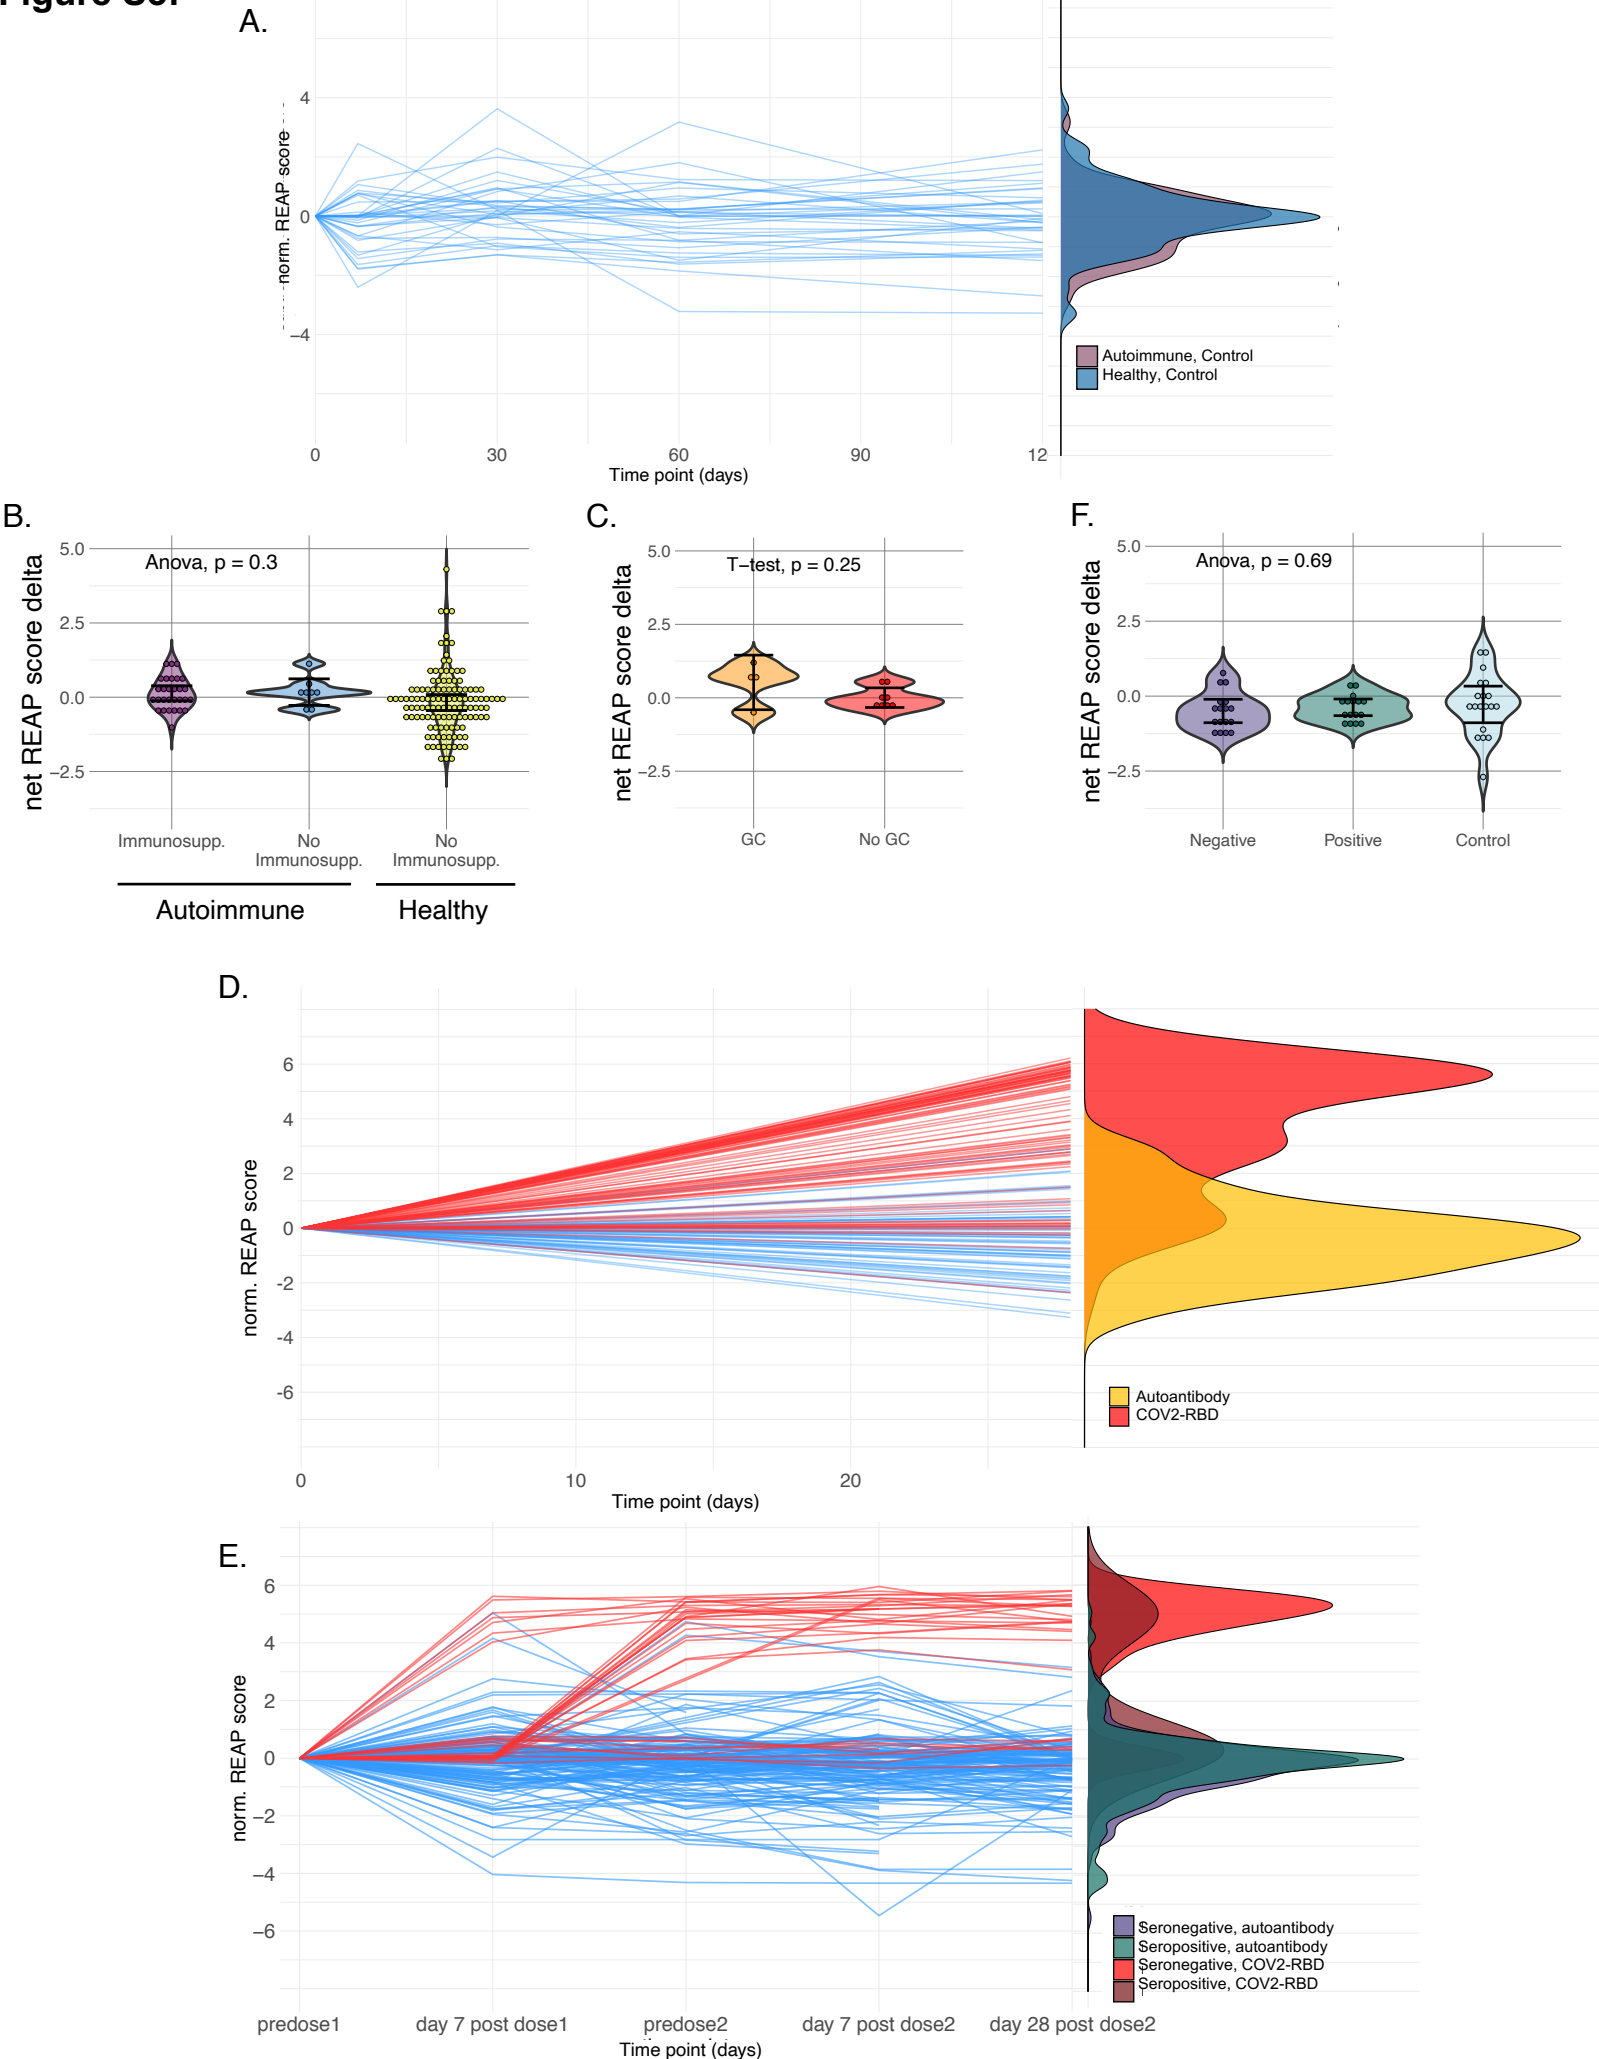

**Figure S4:**

**A.**

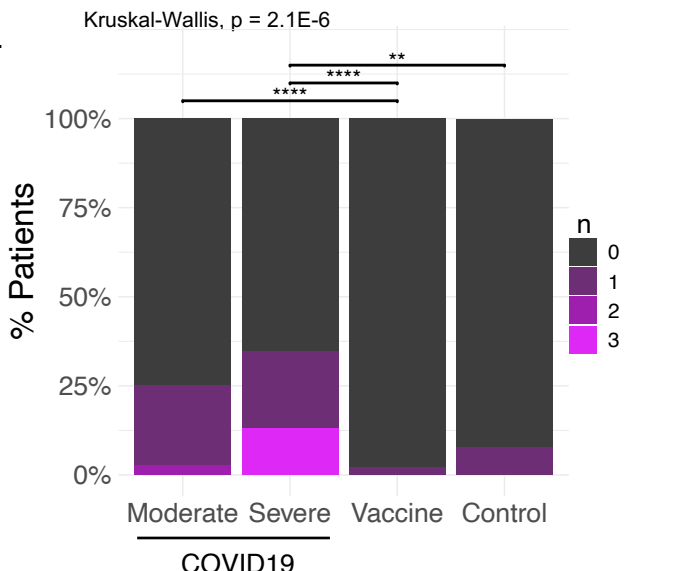

**D.**

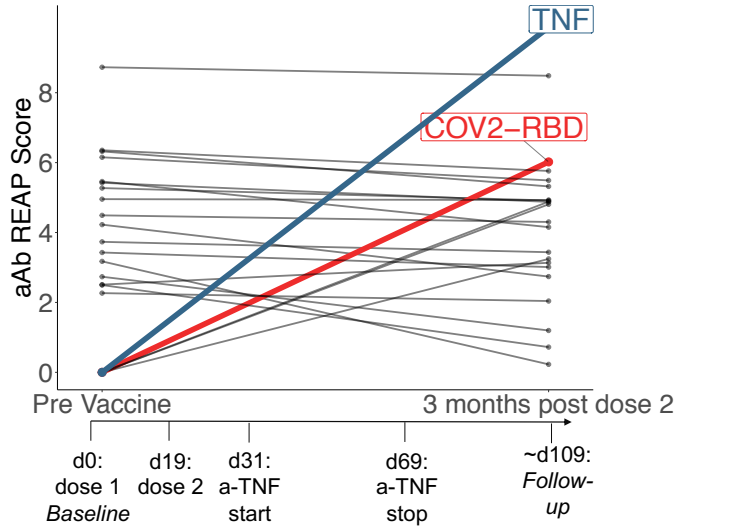

**B.**

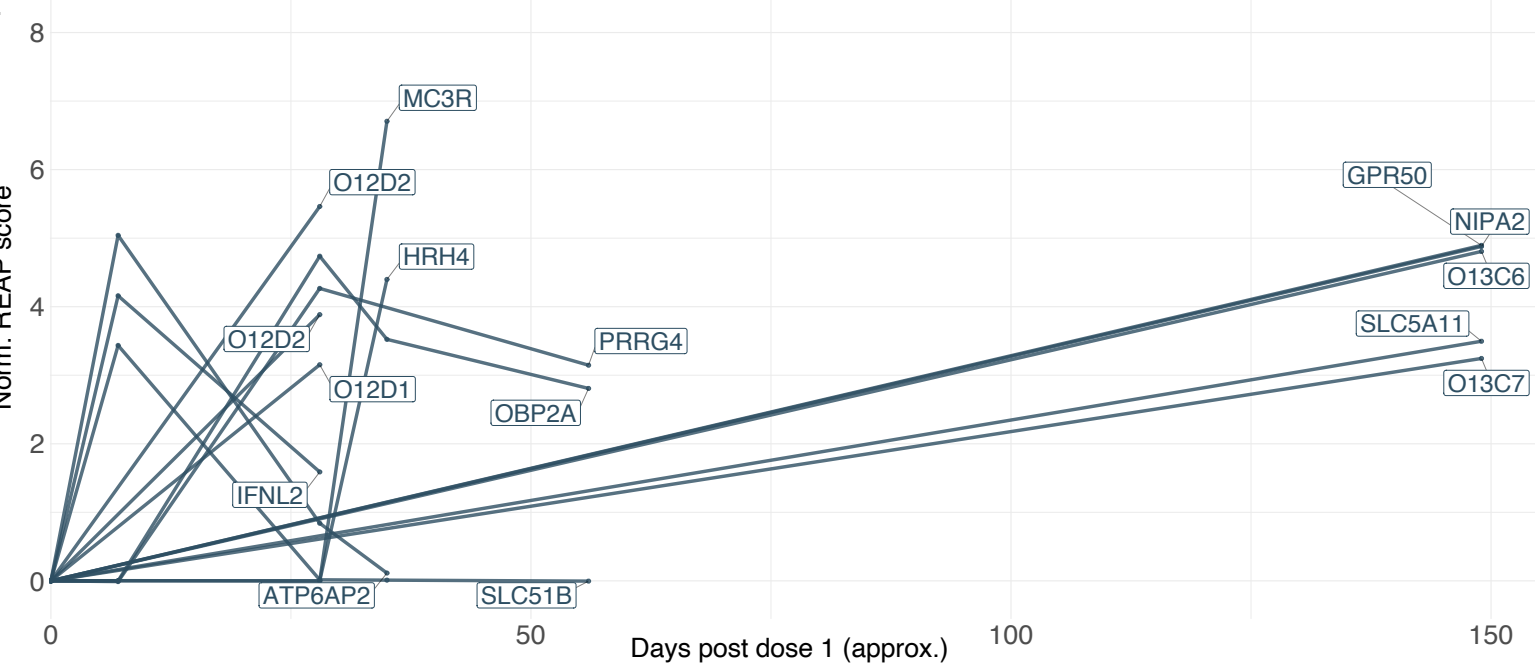

**C.**

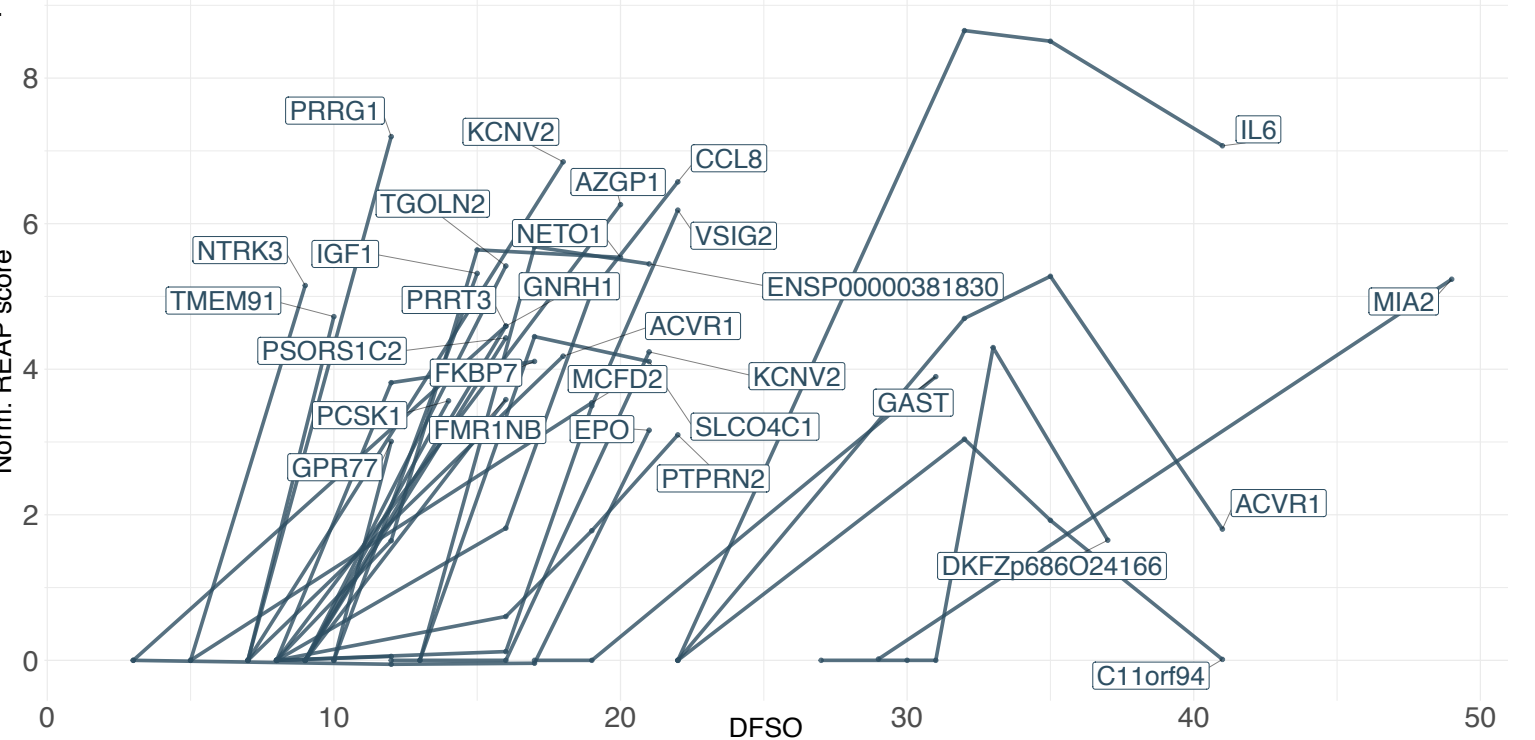

**Figure S5:**

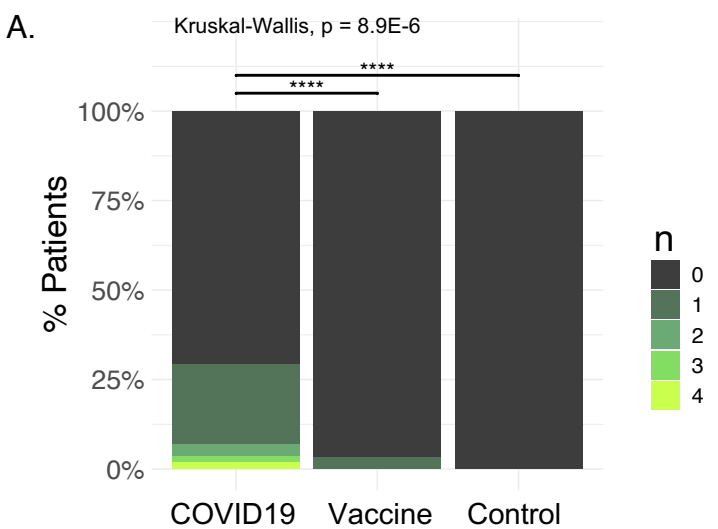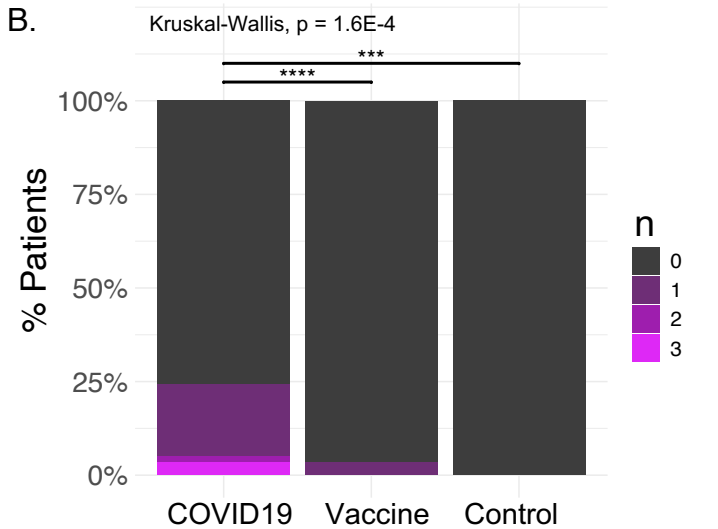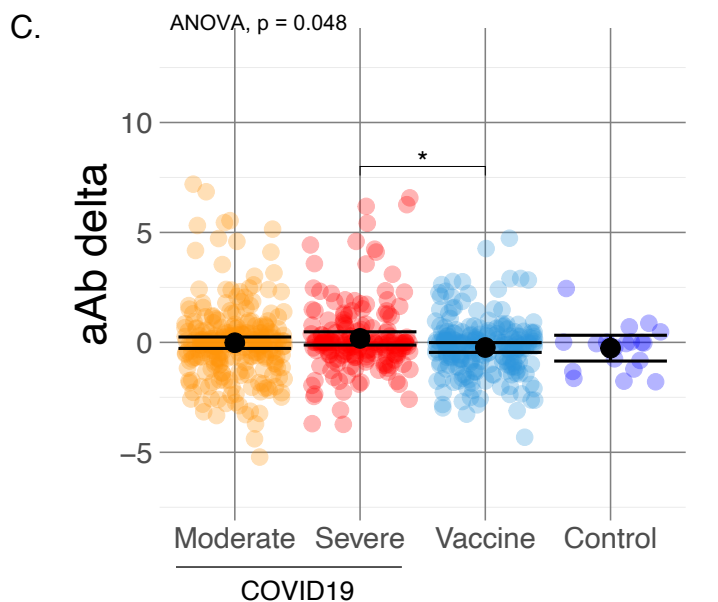

**Figure S6:**

**A.**

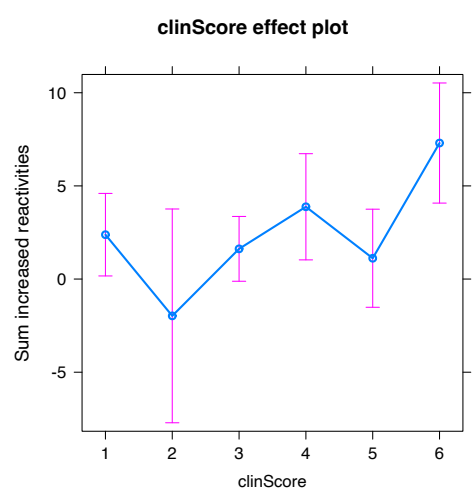

**B.**

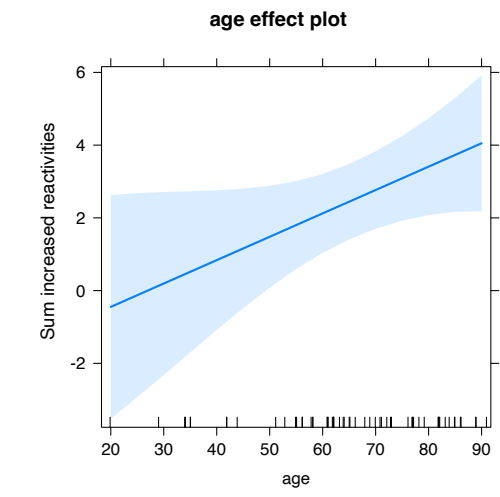

**C.**

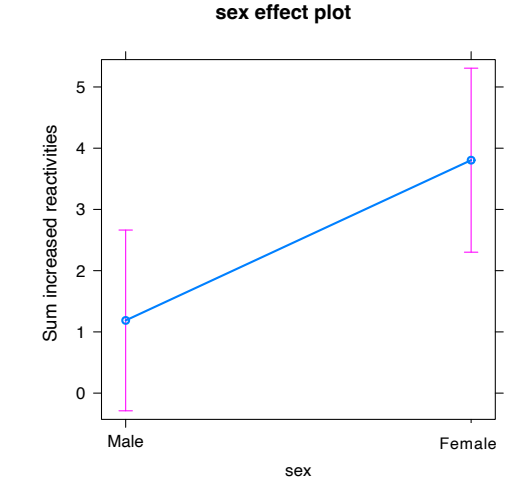

**D.**

|             | Estimate | Std. error | t value | Pr(> t ) | significance |
|-------------|----------|------------|---------|----------|--------------|
| (Intercept) | -3.11163 | 2.34345    | -1.328  | 0.1902   | ns           |
| clinScore2  | -4.35789 | 3.0766     | -1.416  | 0.1627   | ns           |
| clinScore3  | -0.76068 | 1.41596    | -0.537  | 0.5935   | ns           |
| clinScore4  | 1.49745  | 1.79106    | 0.836   | 0.407    | ns           |
| clinScore5  | -1.26444 | 1.72066    | -0.735  | 0.4658   | ns           |
| clinScore6  | 4.91887  | 1.94       | 2.536   | 0.0143   | *            |
| age         | 0.06427  | 0.03175    | 2.024   | 0.0482   | *            |
| sex-Female  | 2.61715  | 1.07506    | 2.434   | 0.0185   | *            |

Residual standard error: 3.927 on 51 degrees of freedom  
 Multiple R-squared: 0.2777, Adjusted R-squared: 0.1785  
 F-statistic: 2.8 on 7 and 51 DF, p-value: 0.01518

**E.**

|                            | Estimate  | Std. error | t value | Pr(> t ) | significance |
|----------------------------|-----------|------------|---------|----------|--------------|
| (Intercept)                | -2.406729 | 1.637986   | -1.469  | 0.147    | ns           |
| Vaccine - Pfizer           | 0.318215  | 1.044253   | 0.305   | 0.762    | ns           |
| Age                        | 0.042078  | 0.027969   | 1.504   | 0.138    | ns           |
| sex-Male                   | 1.251725  | 0.948354   | 1.32    | 0.192    | ns           |
| time span                  | 0.011509  | 0.007246   | 1.588   | 0.118    | ns           |
| Disease category - Healthy | -0.199715 | 0.787323   | -0.254  | 0.801    | ns           |

Residual standard error: 2.501 on 57 degrees of freedom  
 Multiple R-squared: 0.08516, Adjusted R-squared: 0.004912  
 F-statistic: 1.061 on 5 and 57 DF, p-value: 0.3914

Figure S7:

A.

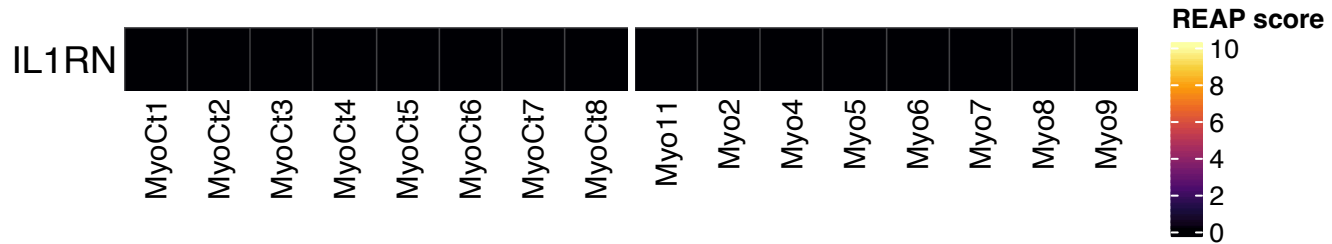

**Supplementary table 1: Yale HCW Cohort Demographics**

|                |             | Vaccine |        | Sex    |      | Serostatus |          |
|----------------|-------------|---------|--------|--------|------|------------|----------|
|                | Age (years) | Moderna | Pfizer | Female | Male | Positive   | Negative |
| % Total        | 44.4        | 78.8    | 21.2   | 81.8   | 18.2 | 48.5       | 51.5     |
| % Seronegative | 43.6        | 58.8    | 41.2   | 82.4   | 17.6 |            |          |
| % Seropositive | 45.3        | 100     | 0      | 81.3   | 18.8 |            |          |

| ID         | Sex | SARS-CoV2 prior infection | Vaccine |
|------------|-----|---------------------------|---------|
| HCW.1.0008 | F   | Negative                  | Pfizer  |
| HCW.1.0009 | F   | Negative                  | Pfizer  |
| HCW.1.0023 | F   | Positive                  | Moderna |
| HCW.1.0029 | F   | Positive                  | Moderna |
| HCW.1.0057 | F   | Negative                  | Moderna |
| HCW.1.0074 | F   | Negative                  | Moderna |
| HCW.1.0090 | F   | Positive                  | Moderna |
| HCW.1.0158 | F   | Positive                  | Moderna |
| HCW.1.0205 | F   | Negative                  | Pfizer  |
| HCW.1.0222 | F   | Negative                  | Pfizer  |
| HCW.1.0223 | M   | Positive                  | Moderna |
| HCW.1.0236 | F   | Negative                  | Moderna |
| HCW.1.0278 | F   | Positive                  | Moderna |
| HCW.1.0288 | F   | Negative                  | Moderna |
| HCW.1.0297 | M   | Positive                  | Moderna |
| HCW.1.0318 | M   | Negative                  | Moderna |
| HCW.1.0324 | F   | Positive                  | Moderna |
| HCW.1.0347 | F   | Positive                  | Moderna |
| HCW.1.0356 | F   | Positive                  | Moderna |
| HCW.1.0365 | F   | Positive                  | Moderna |
| HCW.1.0422 | F   | Negative                  | Pfizer  |
| HCW.1.0436 | F   | Positive                  | Moderna |
| HCW.1.0445 | F   | Positive                  | Moderna |
| HCW.1.0447 | F   | Negative                  | Moderna |
| HCW.1.0453 | F   | Positive                  | Moderna |
| HCW.1.0467 | M   | Negative                  | Moderna |
| HCW.1.0582 | F   | Negative                  | Moderna |
| HCW.1.0596 | F   | Negative                  | Pfizer  |
| HCW.1.0605 | F   | Positive                  | Moderna |
| HCW.1.0607 | F   | Negative                  | Moderna |
| HCW.1.0614 | F   | Negative                  | Moderna |
| HCW.1.0633 | M   | Positive                  | Moderna |
| HCW.1.0636 | M   | Negative                  | Pfizer  |



# Supplementary table 2: Benaroya Cohort Demographics

|                        | Vaccine     |         |        | Sex    |      | Pre-dose time point |                          | Post-dose time point |                      |         | Disease    |  |
|------------------------|-------------|---------|--------|--------|------|---------------------|--------------------------|----------------------|----------------------|---------|------------|--|
|                        | Age (years) | Moderna | Pfizer | Female | Male | day of dose 1       | <1 month prior to dose 1 | 2 weeks post dose 2  | 3 months post dose 2 | Healthy | Autoimmune |  |
| Total cohort (%)       | 44          | 84.4    | 15.6   | 81     | 19   | 34.9                | 65.1                     | 39.7                 | 60.3                 | 39.7    | 60.3       |  |
| Healthy control (%)    | 37          | 88      | 12     | 60     | 40   | 32                  | 68                       | 32                   | 68                   |         |            |  |
| Autoimmune Disease (%) | 48          | 83.8    | 18.4   | 94.7   | 5.3  | 36.8                | 63.2                     | 44.7                 | 55.3                 |         |            |  |

| ID | Race                               | Sex | Hispanic/Latino | Disease                | Prior SARS-CoV2 infection | Pre-vaccine time point        | Post-vaccine time point | Vaccine | Medication Categories | Glucocorticoids                  |
|----|------------------------------------|-----|-----------------|------------------------|---------------------------|-------------------------------|-------------------------|---------|-----------------------|----------------------------------|
| 1  | White, Caucasian                   | F   | no              | Ankylosing Spondylitis | naive                     | up to 1 month prior to dose 1 | 3 months post dose 2    | Moderna | DMARD                 | No                               |
| 2  | White, Caucasian                   | M   | no              | Control                | Negative                  | day of dose 1                 | 2 weeks post dose 2     | Pfizer  | None                  | NA                               |
| 3  | White, Caucasian                   | F   | no              | Control                | naive                     | up to 1 month prior to dose 1 | 3 months post dose 2    | Moderna | None                  | NA                               |
| 4  | White, Caucasian                   | M   | no              | Control                | naive                     | up to 1 month prior to dose 1 | 3 months post dose 2    | Moderna | None                  | NA                               |
| 5  | Pacific Islander, White, Caucasian | F   | yes             | Control                | naive                     | up to 1 month prior to dose 1 | 3 months post dose 2    | Moderna | None                  | NA                               |
| 6  | Asian                              | F   | no              | Control                | naive                     | up to 1 month prior to dose 1 | 3 months post dose 2    | Moderna | None                  | NA                               |
| 7  | White, Caucasian                   | F   | no              | Control                | naive                     | up to 1 month prior to dose 1 | 3 months post dose 2    | Moderna | None                  | NA                               |
| 8  | White, Caucasian                   | M   | no              | Control                | naive                     | up to 1 month prior to dose 1 | 3 months post dose 2    | Moderna | None                  | NA                               |
| 9  | Decline                            | F   | yes             | Control                | naive                     | up to 1 month prior to dose 1 | 3 months post dose 2    | Moderna | None                  | NA                               |
| 10 | White, Caucasian                   | M   | no              | Control                | naive                     | up to 1 month prior to dose 1 | 3 months post dose 2    | Moderna | None                  | NA                               |
| 11 | White, Caucasian                   | F   | no              | Control                | Negative                  | day of dose 1                 | 2 weeks post dose 2     | Pfizer  | None                  | NA                               |
| 12 | White, Caucasian                   | M   | no              | Control                | Negative                  | day of dose 1                 | 2 weeks post dose 2     | Moderna | None                  | NA                               |
| 13 | Asian                              | F   | no              | Control                | naive                     | up to 1 month prior to dose 1 | 3 months post dose 2    | Moderna | None                  | NA                               |
| 14 | White, Caucasian                   | F   | no              | Control                | naive                     | up to 1 month prior to dose 1 | 3 months post dose 2    | Moderna | None                  | NA                               |
| 15 | White, Caucasian                   | F   | no              | Control                | naive                     | up to 1 month prior to dose 1 | 3 months post dose 2    | Moderna | None                  | NA                               |
| 16 | White, Caucasian                   | M   | no              | Control                | naive                     | up to 1 month prior to dose 1 | 3 months post dose 2    | Moderna | None                  | NA                               |
| 17 | Asian                              | F   | no              | Control                | naive                     | up to 1 month prior to dose 1 | 3 months post dose 2    | Moderna | None                  | NA                               |
| 18 | White, Caucasian                   | M   | no              | Control                | Negative                  | day of dose 1                 | 2 weeks post dose 2     | Moderna | None                  | NA                               |
| 19 | White, Caucasian                   | M   | no              | Control                | naive                     | up to 1 month prior to dose 1 | 3 months post dose 2    | Moderna | None                  | NA                               |
| 20 | White, Caucasian                   | M   | no              | Control                | Negative                  | day of dose 1                 | 2 weeks post dose 2     | Moderna | None                  | NA                               |
| 21 | Asian                              | F   | no              | Control                | Negative                  | day of dose 1                 | 2 weeks post dose 2     | Pfizer  | None                  | NA                               |
| 22 | Asian, White, Caucasian            | F   | no              | Control                | naive                     | up to 1 month prior to dose 1 | 3 months post dose 2    | Moderna | None                  | NA                               |
| 23 | White, Caucasian                   | F   | decline         | Control                | Negative                  | day of dose 1                 | 2 weeks post dose 2     | Moderna | None                  | NA                               |
| 25 | Asian                              | F   | no              | Control                | naive                     | up to 1 month prior to dose 1 | 3 months post dose 2    | Moderna | None                  | NA                               |
| 26 | White, Caucasian                   | M   | no              | Control                | Negative                  | day of dose 1                 | 2 weeks post dose 2     | Moderna | None                  | NA                               |
| 27 | White, Caucasian                   | F   | no              | Control                | naive                     | up to 1 month prior to dose 1 | 3 months post dose 2    | Moderna | None                  | NA                               |
| 28 | White, Caucasian                   | F   | no              | Crohns Disease         | naive                     | up to 1 month prior to dose 1 | 3 months post dose 2    | Moderna | None                  | No                               |
| 29 | White, Caucasian                   | F   | no              | Crohns Disease         | naive                     | up to 1 month prior to dose 1 | 3 months post dose 2    | Moderna | None                  | No                               |
| 30 | White, Caucasian                   | F   | no              | Crohns Disease         | naive                     | up to 1 month prior to dose 1 | 3 months post dose 2    | Moderna | Anti-TNF              | No                               |
| 31 | White, Caucasian                   | F   | no              | Multiple Sclerosis     | Negative                  | day of dose 1                 | 2 weeks post dose 2     | Moderna | DMARD                 | No                               |
| 32 | White, Caucasian                   | F   | no              | Multiple Sclerosis     | Negative                  | day of dose 1                 | 2 weeks post dose 2     | Moderna | B cell depletion      | No                               |
| 33 | White, Caucasian                   | M   | no              | Multiple Sclerosis     | Negative                  | day of dose 1                 | 2 weeks post dose 2     | Moderna | B cell depletion      | No                               |
| 34 | White, Caucasian                   | M   | no              | Multiple Sclerosis     | Negative                  | day of dose 1                 | 2 weeks post dose 2     | Moderna | B cell depletion      | No                               |
| 35 | White, Caucasian                   | F   | no              | Multiple Sclerosis     | naive                     | up to 1 month prior to dose 1 | 3 months post dose 2    | Moderna | B cell depletion      | No                               |
| 36 | White, Caucasian                   | F   | no              | Multiple Sclerosis     | naive                     | up to 1 month prior to dose 1 | 3 months post dose 2    | Moderna | None                  | No                               |
| 37 | White, Caucasian                   | F   | no              | Multiple Sclerosis     | Negative                  | up to 1 month prior to dose 1 | 2 weeks post dose 2     | Moderna | B cell depletion      | No                               |
| 38 | White, Caucasian                   | F   | no              | Multiple Sclerosis     | Negative                  | day of dose 1                 | 2 weeks post dose 2     | Pfizer  | B cell depletion      | No                               |
| 39 | White, Caucasian                   | F   | no              | Multiple Sclerosis     | naive                     | up to 1 month prior to dose 1 | 3 months post dose 2    | Pfizer  | B cell depletion      | No                               |
| 40 | White, Caucasian                   | F   | no              | Multiple Sclerosis     | Negative                  | day of dose 1                 | 2 weeks post dose 2     | Pfizer  | B cell depletion      | No                               |
| 41 | White, Caucasian                   | F   | no              | Multiple Sclerosis     | Negative                  | day of dose 1                 | 2 weeks post dose 2     | Pfizer  | DMARD                 | No                               |
| 42 | White, Caucasian                   | F   | no              | Multiple Sclerosis     | Negative                  | day of dose 1                 | 2 weeks post dose 2     | Pfizer  | DMARD                 | No                               |
| 43 | White, Caucasian                   | F   | no              | Multiple Sclerosis     | Negative                  | up to 1 month prior to dose 1 | 2 weeks post dose 2     | Moderna | B cell depletion      | No                               |
| 44 | White, Caucasian                   | F   | no              | Narcolepsy, SLE        | naive                     | up to 1 month prior to dose 1 | 3 months post dose 2    | Moderna | DMARD                 | No                               |
| 45 | Asian, White, Caucasian            | F   | no              | NMO                    | Negative                  | day of dose 1                 | 2 weeks post dose 2     | Moderna | B cell depletion      | No                               |
| 46 | White, Caucasian                   | F   | no              | Psoriatic Arthritis    | naive                     | up to 1 month prior to dose 1 | 3 months post dose 2    | Moderna | Anti-TNF              | No                               |
| 47 | White, Caucasian                   | F   | no              | RA                     | Negative                  | day of dose 1                 | 2 weeks post dose 2     | Moderna | DMARD, Anti IL-6R     | No                               |
| 48 | White, Caucasian                   | F   | no              | RA                     | naive                     | up to 1 month prior to dose 1 | 3 months post dose 2    | Moderna | Anti-TNF, DMARD       | Yes, stopped during vax series   |
| 49 | Asian                              | F   | no              | RA                     | Negative                  | day of dose 1                 | 2 weeks post dose 2     | Pfizer  | DMARD, Anti IL-6R     | No                               |
| 50 | White, Caucasian                   | F   | no              | RA                     | naive                     | up to 1 month prior to dose 1 | 3 months post dose 2    | Moderna | DMARD                 | No                               |
| 51 | Asian                              | F   | no              | RA                     | naive                     | up to 1 month prior to dose 1 | 3 months post dose 2    | Moderna | Anti-TNF              | Yes, stopped prior to vax series |
| 52 | White, Caucasian                   | F   | no              | RA                     | Negative                  | day of dose 1                 | 2 weeks post dose 2     | Moderna | Anti-TNF, DMARD       | Yes                              |
| 53 | White, Caucasian                   | F   | no              | RA                     | naive                     | up to 1 month prior to dose 1 | 3 months post dose 2    | Moderna | Anti-TNF              | No                               |
| 54 | White, Caucasian                   | F   | no              | RA                     | Negative                  | up to 1 month prior to dose 1 | 2 weeks post dose 2     | Moderna | CTLA4lg, DMARD        | No                               |
| 55 | White, Caucasian                   | F   | no              | RA                     | naive                     | up to 1 month prior to dose 1 | 3 months post dose 2    | Moderna | JAKi                  | No                               |
| 56 | White, Caucasian                   | F   | no              | RA                     | Negative                  | day of dose 1                 | 2 weeks post dose 2     | Pfizer  | B cell depletion      | No                               |
| 57 | Asian                              | F   | no              | RA                     | Negative                  | day of dose 1                 | 2 weeks post dose 2     | Moderna | Anti-TNF              | No                               |
| 58 | White, Caucasian                   | F   | no              | RA                     | naive                     | up to 1 month prior to dose 1 | 3 months post dose 2    | Moderna | DMARD                 | Yes                              |
| 59 | White, Caucasian                   | F   | no              | RA - JIA               | naive                     | up to 1 month prior to dose 1 | 3 months post dose 2    | Moderna | None                  | No                               |
| 60 | White, Caucasian                   | F   | yes             | SLE                    | naive                     | up to 1 month prior to dose 1 | 3 months post dose 2    | Moderna | None                  | No                               |
| 61 | Black, African American            | F   | no              | SLE                    | naive                     | up to 1 month prior to dose 1 | 3 months post dose 2    | Moderna | DMARD                 | No                               |
| 62 | White, Caucasian                   | F   | no              | Type 1 Diabetes        | naive                     | up to 1 month prior to dose 1 | 3 months post dose 2    | Moderna | None                  | No                               |
| 63 | White, Caucasian                   | F   | no              | Type 1 Diabetes        | naive                     | up to 1 month prior to dose 1 | 3 months post dose 2    | Moderna | None                  | No                               |
| 64 | White, Caucasian                   | F   | no              | Type 1 Diabetes        | naive                     | up to 1 month prior to dose 1 | 3 months post dose 2    | Moderna | None                  | No                               |

# Supplementary table 3: CoronaVac mRNA Booster Cohort Demographics

|                    | Age range (years) | BMI  | Sex    |      | Prior COVID19 |          | Days since last SARS-CoV2 infection | Days since second dose CoronaVac |
|--------------------|-------------------|------|--------|------|---------------|----------|-------------------------------------|----------------------------------|
|                    |                   |      | Female | Male | Positive      | Negative |                                     |                                  |
| % Total            | 37.5 - 41.5       | 27.6 | 68.7   | 31.3 | 27.6          | 72.4     |                                     | 112                              |
| % no prior COVID19 | 38.5 - 42.5       | 27.8 | 83     | 17   |               |          | 338                                 | 107                              |

| ID  | Sex | Prior SARS-CoV2 infection | Number of prior SARS-CoV2 infections | Days since last SARS-CoV2 infection | Days elapsed between CoronaVac second dose and mRNA Booster |
|-----|-----|---------------------------|--------------------------------------|-------------------------------------|-------------------------------------------------------------|
| 1   | M   | No                        | 0                                    | 0                                   | 132                                                         |
| 2   | F   | No                        | 0                                    | 0                                   | 51                                                          |
| 3   | M   | No                        | 0                                    | 0                                   | 132                                                         |
| 5   | F   | No                        | 0                                    | 0                                   | 132                                                         |
| 6   | F   | No                        | 0                                    | 0                                   | 132                                                         |
| 7   | F   | No                        | 0                                    | 0                                   | 132                                                         |
| 8   | F   | No                        | 0                                    | 0                                   | 132                                                         |
| 9   | F   | No                        | 0                                    | 0                                   | 133                                                         |
| 11  | F   | No                        | 0                                    | 0                                   | 132                                                         |
| 13  | M   | No                        | 0                                    | 0                                   | 132                                                         |
| 16  | F   | No                        | 0                                    | 0                                   | 122                                                         |
| 18  | F   | No                        | 0                                    | 0                                   | 66                                                          |
| 19  | F   | No                        | 0                                    | 0                                   | 35                                                          |
| 20  | M   | No                        | 0                                    | 0                                   | 112                                                         |
| 21  | F   | No                        | 0                                    | 0                                   | 131                                                         |
| 22  | F   | No                        | 0                                    | 0                                   | 36                                                          |
| 23  | F   | No                        | 0                                    | 0                                   | 133                                                         |
| 24  | F   | No                        | 0                                    | 0                                   | 133                                                         |
| 26  | F   | No                        | 0                                    | 0                                   | 136                                                         |
| 27  | M   | No                        | 0                                    | 0                                   | 133                                                         |
| 28  | F   | No                        | 0                                    | 0                                   | 132                                                         |
| 29  | F   | No                        | 0                                    | 0                                   | 133                                                         |
| 30  | F   | No                        | 0                                    | 0                                   | 133                                                         |
| 31  | M   | No                        | 0                                    | 0                                   | 122                                                         |
| 32  | M   | No                        | 0                                    | 0                                   | 133                                                         |
| 33  | F   | No                        | 0                                    | 0                                   | 59                                                          |
| 34  | M   | No                        | 0                                    | 0                                   | 46                                                          |
| 35  | F   | No                        | 0                                    | 0                                   | 133                                                         |
| 36  | F   | No                        | 0                                    | 0                                   | 132                                                         |
| 37  | F   | No                        | 0                                    | 0                                   | 133                                                         |
| 39  | F   | No                        | 0                                    | 0                                   | 133                                                         |
| 40  | F   | No                        | 0                                    | 0                                   | 55                                                          |
| 41  | F   | No                        | 0                                    | 0                                   | 55                                                          |
| 42  | M   | No                        | 0                                    | 0                                   | 109                                                         |
| 43  | F   | No                        | 0                                    | 0                                   | 136                                                         |
| 44  | F   | No                        | 0                                    | 0                                   | 126                                                         |
| 45  | F   | No                        | 0                                    | 0                                   | 136                                                         |
| 46  | F   | No                        | 0                                    | 0                                   | 136                                                         |
| 48  | M   | No                        | 0                                    | 0                                   | 61                                                          |
| 50  | F   | No                        | 0                                    | 0                                   | 124                                                         |
| 51  | F   | No                        | 0                                    | 0                                   | 111                                                         |
| 52  | F   | No                        | 0                                    | 0                                   | 67                                                          |
| 53  | M   | No                        | 0                                    | 0                                   | 80                                                          |
| 54  | F   | No                        | 0                                    | 0                                   | 127                                                         |
| 55  | M   | No                        | 0                                    | 0                                   | 137                                                         |
| 56  | M   | No                        | 0                                    | 0                                   | 48                                                          |
| 57  | F   | No                        | 0                                    | 0                                   | 72                                                          |
| 58  | F   | No                        | 0                                    | 0                                   | 127                                                         |
| 59  | M   | No                        | 0                                    | 0                                   | 137                                                         |
| 60  | F   | No                        | 0                                    | 0                                   | 41                                                          |
| 61  | F   | No                        | 0                                    | 0                                   | 70                                                          |
| 62  | M   | No                        | 0                                    | 0                                   | 125                                                         |
| 63  | F   | No                        | 0                                    | 0                                   | 137                                                         |
| 64  | F   | No                        | 0                                    | 0                                   | 127                                                         |
| 65  | M   | No                        | 0                                    | 0                                   | 138                                                         |
| 66  | F   | No                        | 0                                    | 0                                   | 139                                                         |
| 67  | M   | No                        | 0                                    | 0                                   | 65                                                          |
| 69  | M   | No                        | 0                                    | 0                                   | 53                                                          |
| 71  | F   | No                        | 0                                    | 0                                   | 140                                                         |
| 72  | F   | No                        | 0                                    | 0                                   | 43                                                          |
| 73  | M   | No                        | 0                                    | 0                                   | 144                                                         |
| 74  | F   | No                        | 0                                    | 0                                   | 70                                                          |
| 75  | F   | No                        | 0                                    | 0                                   | 68                                                          |
| 76  | F   | Yes                       | 1                                    | 400                                 | 128                                                         |
| 77  | M   | Yes                       | 1                                    | 491                                 | 132                                                         |
| 78  | M   | Yes                       | 1                                    | 465                                 | 132                                                         |
| 79  | F   | Yes                       | 1                                    | 430                                 | 132                                                         |
| 80  | M   | Yes                       | 1                                    | 491                                 | 121                                                         |
| 82  | F   | Yes                       | 1                                    | 203                                 | 133                                                         |
| 83  | F   | Yes                       | 1                                    | 193                                 | 133                                                         |
| 85  | F   | Yes                       | 1                                    | 462                                 | 133                                                         |
| 86  | M   | Yes                       | 1                                    | 217                                 | 133                                                         |
| 87  | F   | Yes                       | 2                                    | 95                                  | 133                                                         |
| 88  | F   | Yes                       | 1                                    | 462                                 | 133                                                         |
| 89  | F   | Yes                       | 1                                    | 196                                 | 136                                                         |
| 90  | F   | Yes                       | 1                                    | 373                                 | 136                                                         |
| 91  | M   | Yes                       | 1                                    | 465                                 | 136                                                         |
| 92  | M   | Yes                       | 1                                    | 390                                 | 136                                                         |
| 93  | F   | Yes                       | 1                                    | 223                                 | 76                                                          |
| 94  | F   | Yes                       | 1                                    | 410                                 | 126                                                         |
| 95  | M   | Yes                       | 1                                    | 221                                 | 126                                                         |
| 96  | F   | Yes                       | 1                                    | 391                                 | 127                                                         |
| 97  | F   | Yes                       | 1                                    | 380                                 | 127                                                         |
| 98  | F   | Yes                       | 1                                    | 244                                 | 127                                                         |
| 99  | F   | Yes                       | 1                                    | 526                                 | 35                                                          |
| 100 | M   | Yes                       | 1                                    | 163                                 | 105                                                         |
| 101 | F   | Yes                       | 1                                    | 221                                 | 127                                                         |

**Supplementary table 4: Benaroya Longitudinal Control Cohort**

|              | Age  | Sex    |      | Disease |            |
|--------------|------|--------|------|---------|------------|
|              |      | Female | Male | Healthy | Autoimmune |
| % Total      | 29.2 | 46.1   | 53.9 | 27.6    | 72.4       |
| % Healthy    | 28.1 | 57.1   | 42.9 |         |            |
| % Autoimmune | 30.3 | 33.3   | 66.6 |         |            |

| ID | Sex | Race             | Hispanic/Latino | Disease         | Time points (days)    |
|----|-----|------------------|-----------------|-----------------|-----------------------|
| 1  | M   | White, Caucasian | yes             | Healthy         | 0, 7, 30, 60, 90, 120 |
| 2  | M   | White, Caucasian | no              | Type 1 Diabetes | 0, 7, 30, 60, 90, 120 |
| 3  | M   | White, Caucasian | yes             | Type 1 Diabetes | 0, 7, 30, 60, 90, 120 |
| 4  | M   | White, Caucasian | no              | Type 1 Diabetes | 0, 7, 30, 60, 90, 120 |
| 5  | M   | White, Caucasian | no              | Type 1 Diabetes | 0, 7, 30, 60, 90, 120 |
| 6  | F   | White, Caucasian | no              | Type 1 Diabetes | 0, 7, 30, 60, 90, 120 |
| 7  | M   | White, Caucasian | no              | Type 1 Diabetes | 0, 7, 30, 60, 90, 120 |
| 8  | F   | White, Caucasian | no              | Healthy         | 0, 7, 30, 60, 90, 120 |
| 9  | F   | White, Caucasian | no              | Type 1 Diabetes | 0, 7, 30, 60, 90, 120 |
| 10 | M   | White, Caucasian | no              | Healthy         | 0, 7, 30, 60, 90, 120 |
| 11 | F   | White, Caucasian | no              | Healthy         | 0, 7, 30, 60, 90, 120 |
| 12 | F   | White, Caucasian | no              | Type 1 Diabetes | 0, 7, 30, 60, 90, 120 |
| 13 | M   | White, Caucasian | no              | Healthy         | 0, 7, 30, 60, 90, 120 |
| 14 | M   | White, Caucasian | no              | Type 1 Diabetes | 0, 7, 30, 60, 90, 120 |
| 15 | F   | White, Caucasian | no              | Healthy         | 0, 7, 30, 60, 90, 120 |
| 16 | M   | White, Caucasian | no              | Healthy         | 0, 7, 30, 60, 90, 120 |
| 17 | M   | Asian            | no              | Healthy         | 0, 7, 30, 60, 90, 120 |
| 18 | F   | White, Caucasian | no              | Healthy         | 0, 7, 30, 60, 90, 120 |
| 19 | M   | White, Caucasian | no              | Type 1 Diabetes | 0, 7, 30, 60, 90, 120 |
| 20 | M   | White, Caucasian | no              | Healthy         | 0, 7, 30, 60, 90, 120 |
| 21 | F   | White, Caucasian | no              | Healthy         | 0, 7, 30, 60, 90, 120 |
| 22 | F   | White, Caucasian | no              | Type 1 Diabetes | 0, 7, 30, 60, 90, 120 |
| 23 | F   | White, Caucasian | no              | Healthy         | 0, 7, 30, 60, 90, 120 |
| 24 | M   | White, Caucasian | no              | Type 1 Diabetes | 0, 7, 30, 60, 90, 120 |
| 25 | F   | White, Caucasian | no              | Healthy         | 0, 7, 30, 60, 90, 120 |
| 26 | F   | White, Caucasian | no              | Healthy         | 0, 7, 30, 60, 90, 120 |

# Supplementary table 5: COVID-19 Cohort Demographics

|              |             | Sex  |        | Severity |        |
|--------------|-------------|------|--------|----------|--------|
|              | Age (years) | Male | Female | Moderate | Severe |
| Total (%)    | 65.6        | 49.2 | 50.8   | 61.0     | 39.0   |
| Moderate (%) | 66.5        | 55.6 | 44.4   |          |        |
| Severe (%)   | 64.3        | 39.1 | 60.9   |          |        |

| ID         | sex | time points (DFSO) | severity | clinical score |
|------------|-----|--------------------|----------|----------------|
| INP.1.0019 | M   | 5, 9               | moderate | 3              |
| INP.1.0022 | M   | 7, 17              | moderate | 3              |
| INP.1.0024 | M   | 9, 12              | moderate | 3              |
| INP.1.0028 | M   | 5, 14, 18, 22      | severe   | 5              |
| INP.1.0029 | M   | 12, 16, 21         | severe   | 6              |
| INP.1.0043 | M   | 9, 14, 22, 25, 28  | severe   | 5              |
| INP.1.0045 | M   | 8, 16, 19, 22      | severe   | 4              |
| INP.1.0055 | M   | 3, 16              | moderate | 3              |
| INP.1.0061 | M   | 9, 14              | severe   | 6              |
| INP.1.0066 | M   | 12, 16             | severe   | 4              |
| INP.1.0078 | M   | 14, 20             | severe   | 4              |
| INP.1.0079 | M   | 8, 16              | severe   | 5              |
| INP.1.0085 | M   | 5, 19              | moderate | 1              |
| INP.1.0088 | M   | 4, 9               | severe   | 4              |
| INP.1.0091 | M   | 9, 13, 17          | severe   | 6              |
| INP.1.0097 | M   | 9, 13, 25          | moderate | 3              |
| INP.1.0105 | M   | 15, 22, 25         | moderate | 1              |
| INP.1.0109 | M   | 8, 12, 15, 20      | moderate | 3              |
| INP.1.0113 | M   | 13, 18, 24         | moderate | 1              |
| INP.1.0122 | M   | 3, 7               | moderate | 1              |
| INP.1.0143 | M   | 7, 10, 15          | moderate | 1              |
| INP.1.0160 | M   | 10, 13             | moderate | 3              |
| INP.1.0211 | M   | 38, 45             | moderate | 1              |
| INP.1.0241 | M   | 11, 14             | moderate | 3              |
| INP.1.0247 | M   | 7, 15              | moderate | 3              |
| INP.1.0251 | M   | 17, 19, 31         | severe   | 5              |
| INP.1.0256 | M   | 5, 7               | severe   | 4              |
| INP.1.0257 | M   | 9, 11              | severe   | 5              |
| INP.1.0296 | M   | 24, 27, 31         | severe   | 4              |
| INP.1.0303 | M   | 11, 15             | moderate | 3              |
| INP.1.0006 | F   | 12, 16             | severe   | 5              |
| INP.1.0007 | F   | 10, 12             | moderate | 1              |
| INP.1.0010 | F   | 7, 18              | moderate | 1              |
| INP.1.0013 | F   | 22, 26             | moderate | 3              |
| INP.1.0023 | F   | 8, 20              | severe   | 5              |
| INP.1.0025 | F   | 9, 13              | moderate | 2              |
| INP.1.0027 | F   | 3, 12, 17, 21      | moderate | 1              |
| INP.1.0035 | F   | 7, 11              | moderate | 3              |
| INP.1.0047 | F   | 9, 16              | severe   | 6              |
| INP.1.0053 | F   | 8, 12              | moderate | 3              |
| INP.1.0054 | F   | 22, 32, 41         | severe   | 6              |
| INP.1.0059 | F   | 12, 16             | severe   | 6              |
| INP.1.0060 | F   | 13, 17, 21         | moderate | 3              |
| INP.1.0063 | F   | 8, 12, 27, 29, 49  | moderate | 3              |
| INP.1.0069 | F   | 8, 12, 17          | severe   | 4              |
| INP.1.0074 | F   | 4, 8               | moderate | 1              |
| INP.1.0095 | F   | 7, 12              | moderate | 1              |
| INP.1.0110 | F   | 4, 8               | moderate | 2              |
| INP.1.0132 | F   | 11, 13             | moderate | 3              |
| INP.1.0135 | F   | 10, 15             | moderate | 3              |
| INP.1.0207 | F   | 18, 21             | moderate | 3              |
| INP.1.0244 | F   | 12, 16             | moderate | 1              |
| INP.1.0246 | F   | 10, 17             | moderate | 1              |
| INP.1.0259 | F   | 11, 15             | moderate | 3              |
| INP.1.0269 | F   | 7, 10              | moderate | 3              |
| INP.1.0292 | F   | 4, 6               | moderate | 3              |
| INP.1.0294 | F   | 13, 17             | severe   | 5              |
| INP.1.0297 | F   | 27, 30, 31, 33, 37 | severe   | 4              |
| INP.1.0304 | F   | 3, 7               | severe   | 5              |

# Supplementary table 6: Myocarditis Cases and Controls Demographics

| ID    | Group       | Sex | Vaccine | Dose # after which Sx appeared | Sx onset (days post vaccine) | Nucleocapsid IgG | SARS-CoV-2 RNA, NP |
|-------|-------------|-----|---------|--------------------------------|------------------------------|------------------|--------------------|
| MY02  | Myocarditis | M   | Pfizer  | Second                         | 3                            | Non-reactive     | Negative           |
| MY04  | Myocarditis | M   | Pfizer  | Second                         | 2                            | Non-reactive     | Negative           |
| MY05  | Myocarditis | M   | Pfizer  | Second                         | 3                            | Non-reactive     | Negative           |
| MY06  | Myocarditis | M   | Pfizer  | Second                         | 3                            | Non-reactive     | Negative           |
| MY07  | Myocarditis | F   | Pfizer  | Second                         | 3                            | Non-reactive     | Negative           |
| MY08  | Myocarditis | M   | Pfizer  | Second                         | 3                            | Non-reactive     | Negative           |
| MY09  | Myocarditis | M   | Pfizer  | Second                         | 2                            | Non-reactive     | Negative           |
| MY011 | Myocarditis | M   | Pfizer  | Second                         | 3                            | Non-reactive     | Negative           |

Average age: 16.12 years

| ID     | Group               | Sex |
|--------|---------------------|-----|
| MyoCt1 | Myocarditis Control | M   |
| MyoCt2 | Myocarditis Control | M   |
| MyoCt3 | Myocarditis Control | F   |
| MyoCt4 | Myocarditis Control | M   |
| MyoCt5 | Myocarditis Control | M   |
| MyoCt6 | Myocarditis Control | M   |
| MyoCt7 | Myocarditis Control | M   |
| MyoCt8 | Myocarditis Control | M   |

Average age: 16.25 years

### Figure S1:

**A**, CoV-2-RBD REAP score of Benaroya cohort individuals at the final time point, stratified by autoimmune disease diagnosis.  $p = 3.3E-8$ , by one-way ANOVA, with post hoc testing performed using Dunnett's test to compare the mean of every column with healthy control (MS vs Control:  $p = 2.7E-9$ ). AS = Ankylosing Spondylitis; CD = Crohn's Disease; MS = Multiple Sclerosis; SLE = Systemic Lupus Erythematosus; NMO = Neuromyelitis Optica; PA = Psoriatic Arthritis; RA = Rheumatoid Arthritis; T1D = Type 1 Diabetes. Boxplot colored box depicts 25<sup>th</sup> to 75<sup>th</sup> percentile of the data, with the middle line representing the median, upper and lower whiskers represent max and min value within 1.5x 75<sup>th</sup>/25<sup>th</sup> interquartile range, respectively. N= healthy: 25; autoimmune: 38.

**B**, final CoV-2-RBD REAP score of individuals on B cell depletion therapy, stratified by autoimmune diagnosis. Boxplot colored box depicts 25<sup>th</sup> to 75<sup>th</sup> percentile of the data, with the middle line representing the median. N = MS: 9; NMO: 1; RA: 1.

**C**, final CoV-2-RBD REAP score of MS patients, stratified by medication. Boxplot colored box depicts 25<sup>th</sup> to 75<sup>th</sup> percentile of the data, with the middle line representing the median. Each dot represents a single individual. N = DMF: 1; Fingolimod: 2; None: 1; Ocrelizumab: 9.

**D**, CoV-2-RBD ELISA (ng/ml) versus CoV-2-RBD REAP score stratified by medication category. Linear regression depicts the relationship between COV2-RBD REAP score and S1 RBD ELISA with 95% C.I. shaded. Each dot represents a single individual. N = healthy: 25; autoimmune: 38. ( $R = 0.9$ ,  $p < 2.2E-16$ ). \*\*\*\* $P < 0.0001$ , \*\*\* $P < 0.001$  \*\* $P < 0.01$  and \* $P < 0.05$ .

### Figure S2:

**A, B**, Number of preexisting autoantibody reactivities per individual in the BRI cohort, stratified by disease category (A) or autoimmune disease diagnosis (B) (all antigens).  $p = 0.26$  by two-sided Wilcoxon rank-sum test and  $p = 0.57$  by Kruskal-Wallis, respectively. Boxplot colored box depicts 25<sup>th</sup> to 75<sup>th</sup> percentile of the data, with the middle line representing the median, upper/lower whiskers represent max/min value within 1.5x 75<sup>th</sup>/25<sup>th</sup> interquartile range, respectively. Probable drug antibodies (a-TNF, a-IL6R) excluded. AS = Ankylosing Spondylitis; CD = Crohn's Disease; MS = Multiple Sclerosis; SLE = Systemic Lupus Erythematosus; NMO = Neuromyelitis Optica; PA =

Psoriatic Arthritis; RA = Rheumatoid Arthritis; T1D = Type 1 Diabetes. N = Healthy: 25, Autoimmune: 38. **C, D**, Number of preexisting autoantibody reactivities per individual in the Yale HCW cohort (C) and CoronaVac Booster cohort (D) (all antigens).  $p = 0.76$ ,  $0.094$  by two-sided Wilcoxon rank-sum test, respectively. Boxplot colored box depicts 25<sup>th</sup> to 75<sup>th</sup> percentile of the data, with the middle line representing the median, upper/lower whiskers represent max/min value within  $1.5 \times 75^{\text{th}}/25^{\text{th}}$  interquartile range, respectively. N = Yale HCW: seronegative – 17, seropositive 16; CoronaVac; prior COVID – 24, no prior COVID: 63. Probable drug antibodies (a-TNF, a-IL6R) excluded.

### Figure S3:

**A, Line plot:** autoantibody (blue) and CoV-2 RBD (red) REAP score trajectories of the longitudinal control cohort (all antigens). Each line represents one antibody reactivity normalized to baseline score of 0. **Density plot:** REAP score deltas for reactivities in healthy (blue) and autoimmune individuals (pink). Probable drug antibodies (a-TNF, a-IL6R) excluded. **B, C** Average REAP score change for autoantibody reactivities (all antigens) per individual from the first to the final time point in all vaccine cohorts, stratified by autoimmune and immunosuppression status (B) or RA patients on versus off glucocorticoids (GC) (C).  $p = 0.3$  by Anova (B),  $p = 0.25$  by unpaired two-sided t-test (C). Error bars depict the 99% confidence interval. Probable drug antibodies (a-TNF, a-IL6R) excluded. Each dot represents a single individual. Individuals with zero reactivities detected were excluded. N = Autoimmune/Immunosuppression: 30; Autoimmune/No immunosuppression: 8 (B) ; Healthy/No immunosuppression: 106 (B); RA no GC = 8 (C); RA on GC = 4 (C). **D, E. Line plot:** autoantibody (blue) and CoV-2 RBD (red) REAP score trajectories of the CoronaVac booster (D) and Yale HCW (E) cohort (Exo201 antigens only). Each line represents one antibody reactivity normalized to baseline score of 0. **Density plot:** REAP score deltas for reactivities identified in CoronaVac cohort (D) and Yale HCW cohort (E) . Probable drug antibodies (a-TNF, a-IL6R) excluded. **F**, Average REAP score change for autoantibody reactivities per individual from pre- to post-vaccination in the Yale HCW cohort and longitudinal control cohort (all antigens).  $P = 0.69$  by one-way ANOVA. Individuals with zero reactivities

detected were excluded. Each dot represents a single individual. N = Seronegative: 17; Seropositive: 16; Control = 19.

#### **Figure S4:**

**A**, Proportion of patients with  $n$  new reactivities (Exo201 antigens only). New reactivity defined as a REAP reactivity not present at the first time point that is present at a subsequent time point with a REAP score  $>3$ . Significance assessed by Kruskal-wallis ( $p = 2.1E-6$ ) with Dunnett's test for post-hoc comparisons and correction for multiple comparisons by Holm's method: moderate vs vaccine:  $p = 4.7E-5$ ; severe vs vaccine:  $p = 5.1E-7$ ; severe vs control:  $p = 2.1E-3$ . Probable drug antibodies (a-TNF, a-IL6R) were excluded. N= severe COVID19: 23; moderate COVID19: 36; Vaccine: 183; Control: 26. **B,C**, REAP score trajectories of all new autoantibodies appearing after vaccination (**B**) in the BRI, CoronaVac Booster, and Yale HCW cohorts (all antigens) or during acute COVID-19 (**C**) (Exo201 antigens only). Each line indicates one reactivity, with the antigen name adjacent to each line. For the vaccine cohort, days are approximate. DFSO = days from symptom onset. Probable drug antibodies (a-TNF, a-IL6R) were excluded. **D**, Antibody trajectory of an RA patient who began taking the anti-TNF $\alpha$  biologic adalimumab (CoV-2-RBD – red, autoantibody – grey, therapeutic Ab – blue).

#### **Figure S5:**

**A, B**, Proportion of patients with  $n$  increased reactivities (**A**) and  $n$  new reactivities (**B**) (Exo201 antigens only) after filtering for timepoints less than or equal to 28 days post symptom onset (COVID19), post dose 1 (vaccine), or post study initiation (longitudinal control). New reactivity defined as a REAP reactivity not present at the first time point that is present at a subsequent time point with a REAP score  $>3$ . Increased reactivity defined as an increase in REAP score by  $>3$  points at any time point. Significance assessed by Kruskal-wallis ( $p = 8.9E-6$  (**A**),  $p = 1.6E-4$  (**B**)) with Dunn's test for post-hoc comparisons and correction for multiple comparisons by Holm's method. COVID19 vs vaccine:  $p = 2.3E-7$  (**A**),  $1.2E-5$  (**B**); COVID19 vs control:  $p = 8.6E-6$  (**A**),  $p = 6.1E-4$  (**B**). Probable drug antibodies (a-TNF, a-IL6R) were excluded. N = COVID19: 59; Vaccine: 120; Control: 26. **C**, Autoantibody deltas from the first to the final timepoint under 28



days or less, grouped by cohort and/or disease severity.  $p = 0.048$  by one-way ANOVA, post hoc testing by Tukey HSD test, severe vs vaccine:  $p = 0.033$ . Each dot represents one autoantibody (Exo201 antigens only). Probable drug antibodies (a-TNF, a-IL6R) were excluded. N = moderate COVID-19: 273 reactivities, severe COVID-19: 183 reactivities, Vaccine: 220 reactivities, Control: 20 reactivities.

**Figure S6:**

**A,B,C** Effect plot of clinical severity score (1 to 6, categorical) (A) , age (B), and sex (C) on magnitude of increased autoantibodies in multiple linear regression model.

Magnitude of increased autoantibodies calculated by summing the maximum delta REAP score of increased autoreactivities, which were defined as any autoantibody with a score increase of  $>3$ . 95% confidence interval shaded. N = 59. **D**, details of the multiple linear model for increased reactivity magnitude in COVID19 patients. **E**, details of the multiple linear regression model for increased reactivity magnitude in Benaroya mRNA vaccine cohort patients. N = 63.

**Figure S7:**

**A**, Heatmap depicting the REAP scores for IL1RN in the myocarditis and control cohort.
